# Supplementary material for: Lipopolysaccharide-initiated persistent rhinitis causes gliosis and synaptic loss in the olfactory bulb
Source: PubMed Central journal article supplement (PMC5599676; doi:10.1038/s41598-017-10229-w), 2017-09-14
Supplement: 41598_2017_10229_MOESM1_ESM.pdf [file 41598_2017_10229_MOESM1_ESM.pdf]

## Supplementary Data

### **Lipopolysaccharide-initiated persistent rhinitis causes gliosis and synaptic loss in the olfactory bulb**

Sanae Hasegawa-Ishii<sup>1</sup>, Atsuyoshi Shimada<sup>2</sup> and Fumiaki Imamura<sup>1</sup>

<sup>1</sup>Pennsylvania State University College of Medicine, 500 University Drive, Hershey, PA 17033, USA

<sup>2</sup>Faculty of Health Sciences, Kyorin University, 5-4-1 Shimorenjaku, Mitaka, Tokyo 181-8612, Japan

Sanae Hasegawa-Ishii; [sishii@pennstatehealth.psu.edu](mailto:sishii@pennstatehealth.psu.edu)

Atsuyoshi Shimada; [ats7@ks.kyorin-u.ac.jp](mailto:ats7@ks.kyorin-u.ac.jp)

Fumiaki Imamura; [fimamura@pennstatehealth.psu.edu](mailto:fimamura@pennstatehealth.psu.edu)

Corresponding author: Fumiaki Imamura  
([fimamura@pennstatehealth.psu.edu](mailto:fimamura@pennstatehealth.psu.edu))

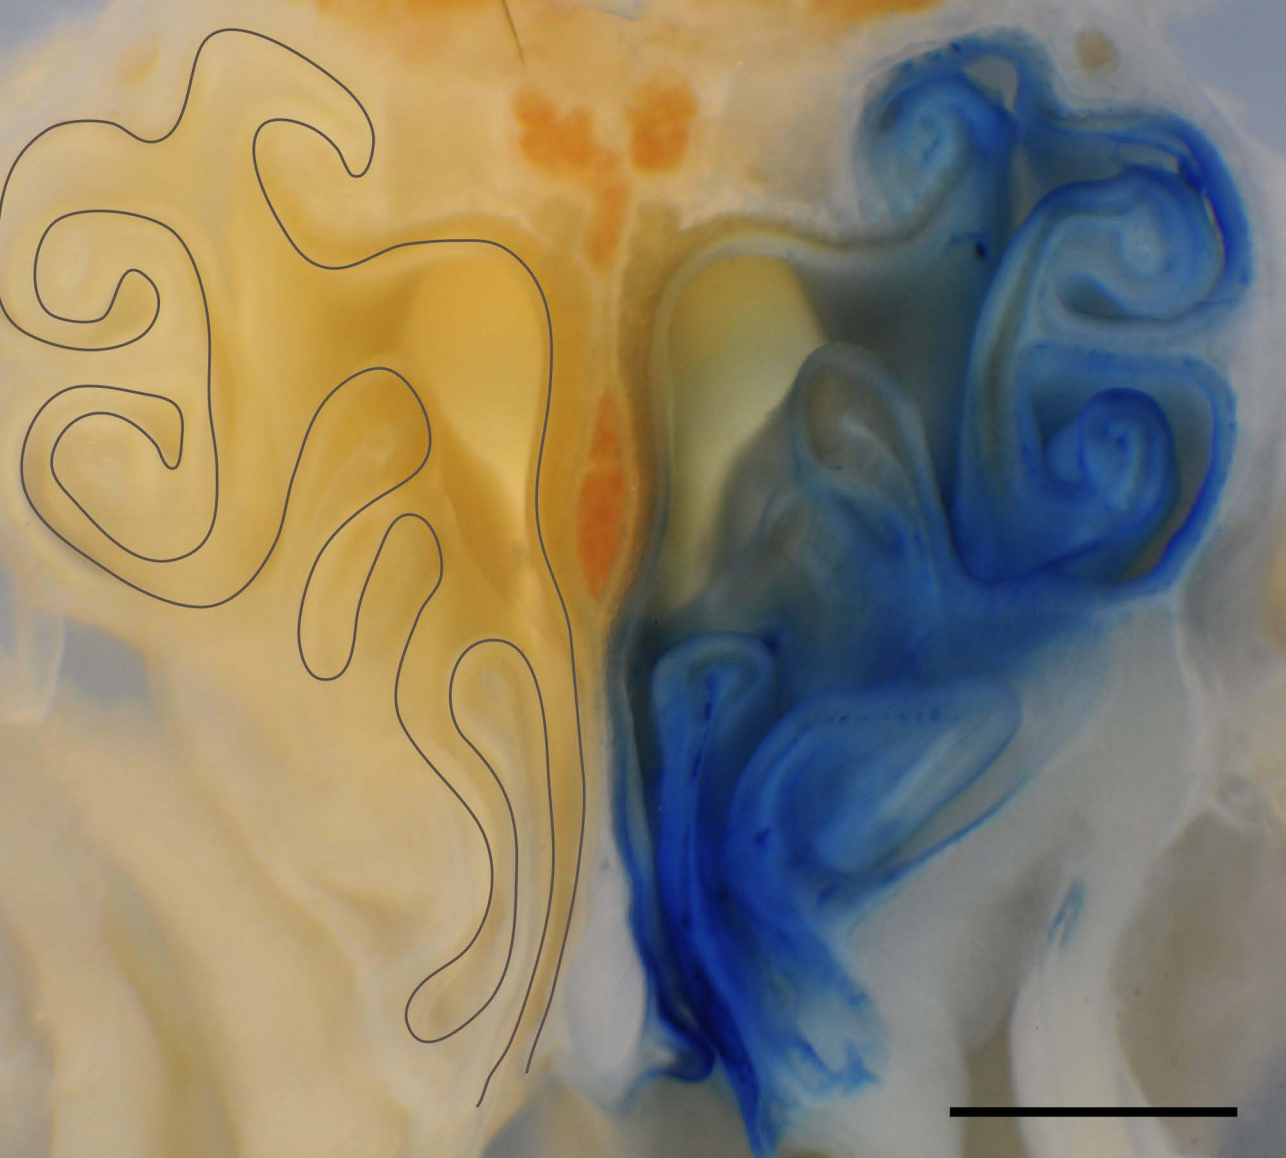

Supplementary Figure1. Intranasal administration of Trypan Blue. Blue stain is localized to the lateral part of the OE, while the medial part is weakly stained. Scale bar, 1 mm.

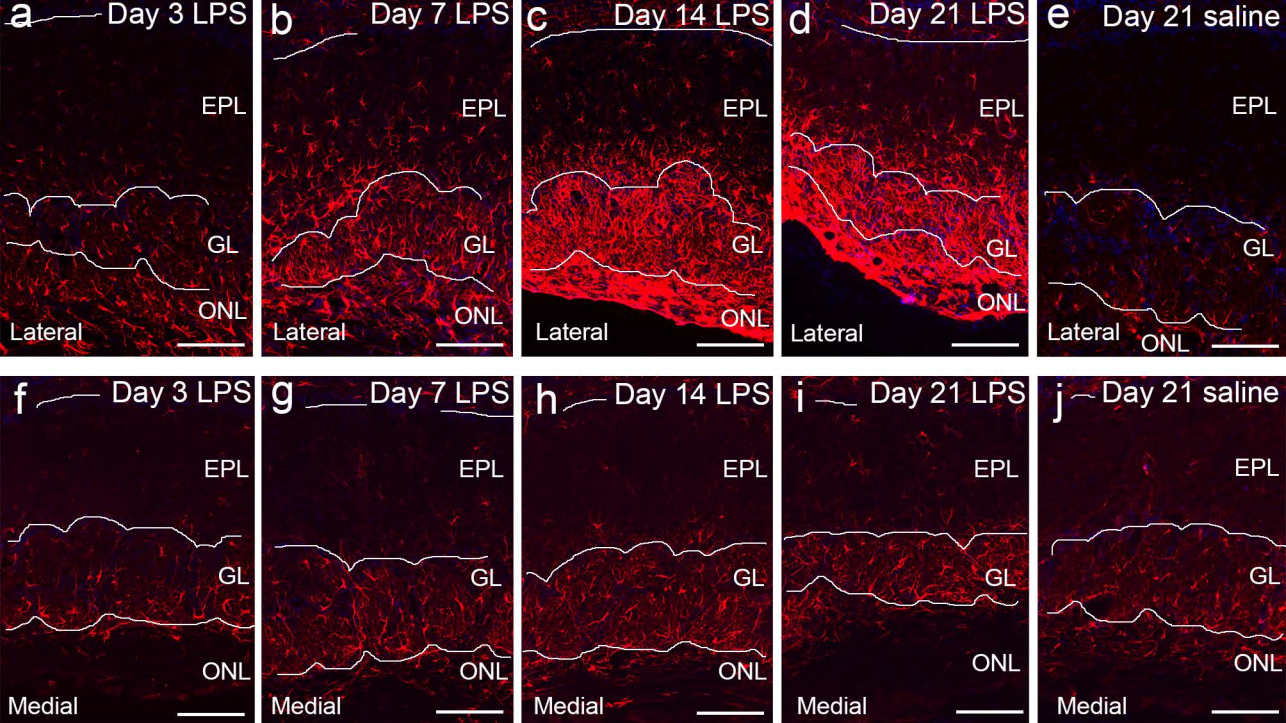

Supplementary Figure 2. Activation of astrocytes in the lateral LPS-treated OB.

(a-e) Hypertrophy and accumulation of GFAP immunopositive astrocytes (red) are observed in in the ONL, GL and EPL of the lateral part of the LPS-treated OB (f-j) GFAP immunopositive astrocytes (red) in the medial part of the LPS-treated OB do not change their morphology or distribution. All nuclei are stained with DAPI (blue).

Scale bars, 100 μm.

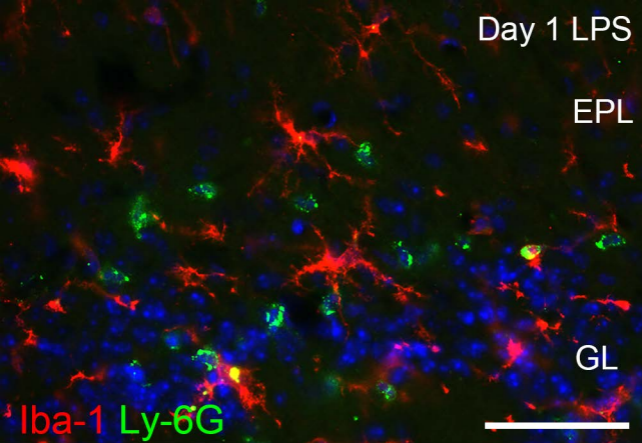

Supplementary Figure 3. Infiltration of inflammatory cells in the OB. Ly-6G-positive cells (green) are found in the GL and EPL of LPS-treated OB at Day 1. Microglia are stained with anti-Iba-1 antibody (red). All nuclei are stained with DAPI (blue). Scale bar, 50  $\mu$ m.

Supplementary Table 1. List of primary antibodies

| Antibody against | Host   | Dilution | Source                                      | Immunogen                                                                                                                |
|------------------|--------|----------|---------------------------------------------|--------------------------------------------------------------------------------------------------------------------------|
| ACIII            | Rabbit | 1:200    | Santa Cruz Biotechnology (Dallas, TX, USA)  | AA 1-270 mapping at the N-terminus of adenylate cyclase III of human origin                                              |
| Ly-6G            | Rat    | 1:200    | AdipoGen (Liestal, Switzerland)             | Purified mouse BALB/ c neutrophils, clone Nimp-R14                                                                       |
| CD11b            | Rat    | 1:200    | Bio Rad Laboratories (Hercules, CA, USA)    | Thioglycollate-elicited Peritoneal Macrophages, clone 5C6                                                                |
| CD3              | Rabbit | 1:100    | Thermo Scientific (Fremont, CA, USA)        | A synthetic 13-mer peptide corresponding to aa 156-168 of the epsilon chain of human CD3 protein, clone SP7              |
| Iba-1            | Rabbit | 1:200    | Wako Chemicals USA (Richmond, VA, USA)      | A synthetic peptide corresponding to the Iba-1 C-terminal sequence, (PTGPPAKKAISELP)                                     |
| IL-1 $\beta$     | Goat   | 1:200    | R&D Systems (Minneapolis, MN, USA)          | E. coli-derived recombinant mouse IL-1 $\beta$ /IL-1F2 Val118-Ser269                                                     |
| OMP              | Goat   | 1:1000   | Wako Chemicals USA                          | Rodent OMP                                                                                                               |
| GAP43            | Rabbit | 1:1000   | Novus Biologicals (Littleton, CO, USA)      | C-terminal peptide of rat and mouse GAP43 with an N-terminal Cys added to allow chemical coupling to KLH carrier protein |
| OCAM             | Rat    | 1:200    | R&D Systems                                 | Mouse myeloma cell line NS0-derived recombinant mouse OCAM Leu20-Gly700                                                  |
| GFAP             | Rabbit | 1:1000   | Agilent Technologies (Santa Clara, CA, USA) | GFAP isolated from cow spinal cord                                                                                       |
| TH               | Rabbit | 1:500    | Millipore (Temecula, CA, USA)               | Denatured tyrosine hydroxylase from rat pheochromocytoma                                                                 |
| Calretinin       | Mouse  | 1:400    | Millipore                                   | Recombinant rat calretinin, clone 6B8.2                                                                                  |
| vGLUT1           | Rabbit | 1:1000   | Synaptic Systems (Gottingen, Germany)       | Strep-Tag fusion protein of rat vGluT 1 corresponding to aa 456-560                                                      |
| SOX-2            | Rabbit | 1:300    | Abcam (Cambridge, MA, USA)                  | A synthetic peptide corresponding to Human SOX2                                                                          |
| 5T4              | Rabbit | 1:500    | Gift from Dr. K. Mori <sup>31</sup>         | Peptide corresponding to C-terminal region of mouse 5T4 (RYEINADPRLTNLSSNSDV)                                            |

ACIII, adenylate cyclase III; Ly-6G, leukocyte antigen-6G; Iba-1, ionized-calcium binding adaptor molecule-1; IL-1 $\beta$ , interleukin-1 beta; OMP, olfactory marker protein; GAP43, growth associate protein 43; OCAM; olfactory cell adhesion molecule; GFAP, glial fibrillary acidic protein; TH, Tyrosine hydroxylase; vGLUT1, vesicular glutamate transporter 1
